# Perioperative Platelet Transfusions

Aaron Stansbury Hess, M.D., Ph.D., Jagan Ramamoorthy, M.D., John Rider Hess, M.D., M.P.H.

Platelets are critical for clot formation. A normal platelet count is  $250 \times 10^3$  cells/ $\mu\text{l}$  of blood, and there are approximately  $2 \times 10^{12}$  platelets in the whole body, with two thirds in circulation and one third sequestered in the spleen. Platelets provide both primary hemostasis through the formation of a platelet plug and secondary hemostasis by providing “rafts” of negatively charged surface phospholipids on which the amplification and propagation phases of plasma coagulation occur.<sup>1</sup> If lost or dysfunctional platelets need to be replaced quickly, transfusion of stored donor platelets is the only widely available therapy.

It is sometimes hard to know when to transfuse platelets. Stored platelets are a complex biologic therapy, and transfusion results depend on the donor, processing, and storage. Most perioperative practices are not supported by high-quality evidence. Traditionally, it is acceptable to perform percutaneous procedures with platelets greater than or equal to  $20 \times 10^3$  cells/ $\mu\text{l}$ , do abdominal surgery with greater than or equal to  $50 \times 10^3$  cells/ $\mu\text{l}$ , and do neurologic or posterior ocular surgery with greater than or equal to  $100 \times 10^3$  cells/ $\mu\text{l}$  (table 1). These are apparently acceptable limits—the true physiologic thresholds are probably lower—and exceptions abound. For example, research in trauma suggests that actively bleeding patients do better when platelets are administered early, even when counts are maintained above  $100 \times 10^3$  cells/ $\mu\text{l}$ .<sup>2</sup> On the other hand, patients taking antiplatelet agents who have nonsurgical intracranial hemorrhage may be harmed by platelet transfusion.<sup>3</sup> Optimal platelet therapy is also hampered by a lack of tests that can stratify bleeding risk, rapidly and accurately differentiate causes of coagulopathy, or reliably guide physicians at the bedside.

This paper will discuss guidelines, physiologic evidence, and the results of randomized clinical trials as they affect perioperative platelet therapy. By “perioperative” we mean any procedure in which a patient might be under the care of an anesthesiologist. In most cases, specific, actionable evidence is missing, so it is impossible to provide a formal systematic review.<sup>4</sup> All references were found by searching Medline or from the citations of references found in Medline. For the interested reader, we have provided a list of particularly influential primary clinical research (table 2).

## A Brief History of Platelet Collection and Transfusion

Platelets were recognized as a constituent of blood in the 1870s, and their function identified shortly after, but for 70 yr there was no way to isolate them in a closed system.<sup>5</sup> In 1959 it was demonstrated that exchange transfusion in children with severe thrombocytopenia could correct their platelet counts and stop bleeding.<sup>6</sup> Research in the 1960s and 1970s produced improved storage methods and the discovery that storing platelets at room temperature preserved their lifespan after transfusion,<sup>7</sup> and that pools of platelets from multiple donors resulted in higher posttransfusion platelet counts.<sup>8</sup> Most platelets in the United States are now obtained by apheresis from a single donor, but the doses established in these studies are still used today.<sup>9</sup>

## Rationale for Perioperative Platelet Transfusion

Platelets are transfused perioperatively either as prophylaxis against bleeding or as therapy to stop it. The value of platelet transfusion at extremes of thrombocytopenia, injury, and blood loss is not in question,<sup>10</sup> but an anesthesiologist is more likely to encounter situations where the marginal utility of platelets is uncertain. Attempts to establish practical transfusion triggers in common scenarios usually fail to produce consensus.<sup>11–13</sup> Appropriate triggers according to functional tests such as platelet function analyzers and viscoelastic testing are also unclear, and may not be superior to algorithms based on platelet count alone.<sup>11,14</sup> It is not surprising that anesthesiologists report using patient history, the surgical scenario, and the amount of blood loss to guide platelet therapy with only partial reference to laboratory values. Not surprisingly, there is a wide variation in perioperative platelet transfusion practice.<sup>15,16</sup>

## Common Platelet Products for Transfusion

There are many different platelet products available in the United States, and they have a range of effects depending on the donor, processing, and storage.<sup>17</sup> Misunderstanding the composition of platelet products has been implicated in unnecessary transfusions.<sup>18</sup> The most important questions for the anesthesiologist are, “what is the total platelet

This article has been selected for the Anesthesiology CME Program. Learning objectives and disclosure and ordering information can be found in the CME section at the front of this issue. This article is featured in “This Month in Anesthesiology,” page 1A.

Submitted for publication September 1, 2020. Accepted for publication December 7, 2020. Published online first on January 7, 2020. From the Department of Anesthesiology (A.S.H., J.R.), and the Department of Pathology and Laboratory Medicine (A.S.H.), University of Wisconsin, Madison, Wisconsin; and the Department of Laboratory Medicine and Pathology, University of Washington, Seattle, Washington (J.R.H.).

Copyright © 2021, the American Society of Anesthesiologists, Inc. All Rights Reserved. Anesthesiology 2021; 134:471–9. DOI: 10.1097/ALN.0000000000003670

**Table 1.** Common Platelet Count Thresholds for Procedures and Platelet Transfusion

| Procedure                                                           | Platelet Count                                                   | Society                                                               | Strength of Recommendation/<br>Level of Evidence            |
|---------------------------------------------------------------------|------------------------------------------------------------------|-----------------------------------------------------------------------|-------------------------------------------------------------|
| Neurologic or posterior ocular surgery                              | 100 × 10 <sup>3</sup> /μl                                        | British Committee for Standards in Haematology <sup>63</sup>          | Strong/low                                                  |
| Epidural catheter placement or removal                              | 75–100 × 10 <sup>3</sup> /μl                                     | Society for Obstetric Anesthesia and Perinatology <sup>43</sup>       | Not graded or endorsed, but acknowledged as common practice |
| Bleeding after cardiopulmonary bypass<br>Major nonneuraxial surgery | 80 × 10 <sup>3</sup> /μl                                         | British Committee for Standards in Haematology <sup>63</sup>          | Moderate/low                                                |
|                                                                     | 50–100 × 10 <sup>3</sup> /μl                                     | Society of Cardiovascular Anesthesiologists <sup>49</sup>             | Not graded                                                  |
|                                                                     | 50 × 10 <sup>3</sup> /μl                                         | AABB (formerly the American Association of Blood Banks) <sup>38</sup> | Weak/low                                                    |
| Gastrointestinal endoscopy                                          | 40–50 × 10 <sup>3</sup> /μl                                      | American Society of Clinical Oncology <sup>39</sup>                   | Weak/low                                                    |
|                                                                     | 20 × 10 <sup>3</sup> /μl (50 × 10 <sup>3</sup> /μl for biopsies) | American Society for Gastrointestinal Endoscopy <sup>64</sup>         | Not graded                                                  |
| Central line placement                                              | 20 × 10 <sup>3</sup> /μl                                         | AABB (formerly the American Association of Blood Banks) <sup>38</sup> | Weak/low                                                    |
| Bronchoscopy                                                        | 20 × 10 <sup>3</sup> /μl                                         | British Thoracic Society <sup>65</sup>                                | Weak/low                                                    |
| Prophylaxis of spontaneous bleeding                                 | 10 × 10 <sup>3</sup>                                             | AABB (formerly the American Association of Blood Banks) <sup>38</sup> | Strong/moderate                                             |

content of the product?” and “what volume of plasma is also in the product?” (fig. 1). A single “unit” of “random donor” platelets derived from 500 ml of donor whole blood usually contains at least  $55 \times 10^9$  platelets in 40 ml of plasma and is stored at 22°C. Transfusing one random-donor unit will raise the recipient platelet count by approximately  $5 \times 10^3$  cells/μl, and so it is common to make “pools” of five or six random donor units in approximately 200 ml of plasma. In a stable, nonbleeding, and afebrile adult, transfusing one pool will raise the recipient platelet count by approximately  $30 \times 10^3$  cells/μl, but this varies inversely with body mass and area: the platelet count may only rise 15 to  $20 \times 10^3$  cells/μl in an obese, 100-kg patient, and may rise 40 to  $50 \times 10^3$  cells/μl in a thin, 50-kg one.<sup>19</sup> Apheresis, or “single-donor” platelets, are a concentrate collected from a single donation and usually contain 3 to  $4 \times 10^{11}$  platelets in approximately 280 ml of plasma. This is equivalent to a platelet pool, and transfusing one apheresis unit will also raise the platelet count by approximately  $30 \times 10^3$  cells/μl.<sup>17</sup> Random-donor and apheresis platelets are collected in donor plasma with a coagulation factor activity similar to any other unit of plasma. However, apheresis platelets in the United States are often modified by replacing two thirds of the plasma with an additive solution. This improves platelet lifespan and reduces the rate of minor transfusion reactions but may decrease the acute hemostatic utility of the unit compared to apheresis platelets in plasma.<sup>20,21</sup> More than half of the platelet units supplied by the American Red Cross (Washington, D.C.) are stored in additive solution, with a system-wide goal of 70% by the end of 2020 (J. Weiss, M.D., American Red Cross, Madison, Wisconsin, email communication, October 2020).

### “Cold” Platelets, Whole Blood, and Other Uncommon Platelet Products

“Cold” platelets are platelets stored at 4°C instead of the conventional 22°C. Cold platelets are cleared from the circulation more rapidly than conventional platelets, but may have greater

immediate hemostatic efficacy.<sup>22–25</sup> Trials of cold-stored platelets in cardiac surgery and other clinical scenarios are ongoing. Whole blood for transfusion contains red cells, plasma, and platelets; is stored cold at 4°C; and is increasingly common in civilian trauma resuscitation.<sup>26</sup> Platelet counts after whole blood transfusion in bleeding patients are comparable to those obtained with balanced multicomponent resuscitation.<sup>27</sup> In centers where it is available, it is common to begin resuscitation with whole blood and then switch to laboratory-guided component therapy after major bleeding is controlled.<sup>28</sup> Other products also exist, such as frozen or lyophilized platelets, but these are not licensed in the United States.

### Perioperative Thrombocytopenia

Thrombocytopenia is defined as a platelet count less than  $150 \times 10^3$  cells/μl. Five to ten percent of patients will be thrombocytopenic preoperatively, and an unknown number will develop thrombocytopenia in the perioperative period.<sup>29</sup> Perioperative thrombocytopenia is usually caused by hemodilution and consumption, but can also be the result of antiplatelet therapy, heparin, other medications, decreased production, increased sequestration, immune destruction, and laboratory artifact.<sup>30</sup> Any degree of preoperative thrombocytopenia is associated with higher odds of transfusion, complications, long-term care, readmission, reoperation, and death in a dose-dependent fashion,<sup>31</sup> and patients who require platelet transfusion also have a higher odds of red cell transfusion, reoperation, and death.<sup>29</sup>

One in three of cases of platelet refractoriness is associated with alloimmunization against donor platelet antigens.<sup>32</sup> The most common alloantibodies are against human leukocyte antigens A or B, and are usually seen in multiparous or multiply transfused patients.<sup>33</sup> Platelet crossmatching, selecting donors with the same antigen phenotype as the patient, or selecting donors who lack the cognate antigens to the patient’s antibodies can produce improved platelet increments.<sup>33</sup> All these techniques require additional

**Table 2.** Suggested Important and Influential Studies on Perioperative Platelet Transfusion

| Authors                              | Title                                                                                                                                                                                             | Description                                                                                                                                                                                                                                                                                                                 | Notes                                                                                                                                                                                                              |
|--------------------------------------|---------------------------------------------------------------------------------------------------------------------------------------------------------------------------------------------------|-----------------------------------------------------------------------------------------------------------------------------------------------------------------------------------------------------------------------------------------------------------------------------------------------------------------------------|--------------------------------------------------------------------------------------------------------------------------------------------------------------------------------------------------------------------|
| Slichter <i>et al.</i> <sup>9</sup>  | Dose of prophylactic platelet transfusions and prevention of hemorrhage. (PLADO Trial)                                                                                                            | Trial of 1,272 stable medical cancer patients receiving one of three different doses of prophylactic platelets to prevent grade 2 or higher bleeding.                                                                                                                                                                       | Note figure 1. Risk of grade 2 or higher bleeding in stable patients low and constant at platelet counts between 10 and $80 \times 10^3$ cells/ $\mu$ l.                                                           |
| Avidan <i>et al.</i> <sup>14</sup>   | Comparison of structured use of routine laboratory tests or near-patient assessment with clinical judgement in the management of bleeding after cardiac surgery.                                  | Trial of 102 patients receiving postbypass transfusion during coronary artery bypass graft guided by algorithms based on point-of-care vs. laboratory coagulation tests to reduce blood loss and transfusion. Results were compared to a historical control group where transfusion was guided by physician judgment alone. | One of the stronger studies providing evidence for the superiority of laboratory testing-guided transfusion algorithms over physician judgment in postbypass bleeding.                                             |
| Holcomb <i>et al.</i> <sup>52</sup>  | Transfusion of plasma, platelets, and red blood cells in a 1:1:1 vs a 1:1:2 ratio and mortality in patients with severe trauma: The PROPPR randomized clinical trial.                             | Trial of 680 severely injured trauma patients predicted to require massive transfusion who received platelets, plasma, and red blood cells in an initially fixed 1:1:1 or 1:1:2 ratio.                                                                                                                                      | Although not the primary outcome, hemorrhagic death was significantly less common in the 1:1:1 arm.                                                                                                                |
| Cardenas <i>et al.</i> <sup>2</sup>  | Platelet transfusions improve hemostasis and survival in a substudy of the prospective, randomized PROPPR trial.                                                                                  | Subgroup analysis of PROPPR trial participants who received only the first cooler of products.                                                                                                                                                                                                                              | Although conclusions are limited by the <i>post hoc</i> nature of the analysis, the study strongly suggests that early, empiric platelet administration in massive traumatic bleeding is associated with survival. |
| Li <i>et al.</i> <sup>59</sup>       | Effect of acetylsalicylic acid usage and platelet transfusion on postoperative hemorrhage and activities of daily living in patients with acute intracerebral hemorrhage.                         | Trial of 780 patients undergoing emergency craniotomy for hypertensive basal ganglia hemorrhage. Patients on aspirin with an aspirin effect detectable by aggregometry were randomized to receive 0, 1, or 2 units of frozen apheresis platelets.                                                                           | Frozen apheresis platelets are not currently used in the United States; however, this suggests that there is benefit for laboratory-guided platelet transfusion to reverse bleeding associated with aspirin.       |
| Baharoglu <i>et al.</i> <sup>3</sup> | Platelet transfusion <i>versus</i> standard care after acute stroke due to spontaneous cerebral hemorrhage associated with antiplatelet therapy (PATCH): A randomised, open-label, phase 3 trial. | Trial of 190 patients on antiplatelet therapy with supratentorial intracerebral hemorrhage who received platelet transfusion or standard of care.                                                                                                                                                                           | Patients in the platelet arm had higher death-or-dependence, although this may have been partly due to baseline imbalances.                                                                                        |

time and expertise, and advance consultation with transfusion medicine specialists is usually necessary.

### Prophylactic Platelet Transfusions before Percutaneous Procedures

A normal platelet count is much higher than what is required for successful thrombin generation and maintenance of endothelial integrity at rest.<sup>34</sup> Based on large trials in hematological malignancies, the risk of clinically significant bleeding is modest and constant down to a platelet count of  $10 \times 10^3$  cells/ $\mu$ l, and prophylactic platelet transfusions to prevent spontaneous bleeding are usually not necessary above a platelet count of 5 to  $10 \times 10^3$  cells/ $\mu$ l.<sup>9,35</sup>

Data for prophylactic platelet transfusions before percutaneous procedures are sparse. One small trial and a few larger observational studies suggest that central lines placement by experienced providers is low-risk at platelet counts greater than or equal to 10 to  $20 \times 10^3$  cells/ $\mu$ l.<sup>12,36</sup> For high-risk procedures such as liver biopsy, the Society of Interventional Radiology (Fairfax, Virginia) recommends a transfusion threshold of less than  $50 \times 10^3$  cells/ $\mu$ l because observational studies found a slightly increased risk of bleeding below this level.<sup>37</sup> The AABB (formerly the American Association of Blood Banks; Bethesda, Maryland) recommends platelet transfusion before lumbar puncture for patients with a

platelet count less than  $50 \times 10^3$  cells/ $\mu$ l, and the American Society of Clinical Oncology (Alexandria, Virginia) recommends a threshold of  $50 \times 10^3$  cells/ $\mu$ l for lumbar puncture in newly diagnosed pediatric patients with leukemia and  $20 \times 10^3$  cells/ $\mu$ l for stable pediatric patients.<sup>38,39</sup>

All society guidelines regarding platelet counts before percutaneous procedures are weak recommendations based on low-quality evidence. They are also conservative: a review of 5,223 consecutive lumbar punctures in 958 children at a pediatric cancer center, including 199 children with counts less than  $20 \times 10^3$  cells/ $\mu$ l, found an increase in the proportion of traumatic punctures, but not one serious complication.<sup>40</sup> A Danish cohort of 64,730 patients undergoing 83,711 lumbar punctures found that the hematoma rate was relatively constant around 0.2%, regardless of platelet count, although these results may be biased by patient selection.<sup>41</sup> There is no good evidence that preprocedural platelet transfusion reduces the risks of severe complications, and providers frequently fail to verify the results before starting the procedure.<sup>42</sup>

### Thrombocytopenia and Prophylactic Platelet Transfusions before Neuraxial Anesthesia

The American Society of Anesthesiologists (Schaumburg, Illinois) and the Society for Obstetric Anesthesia and

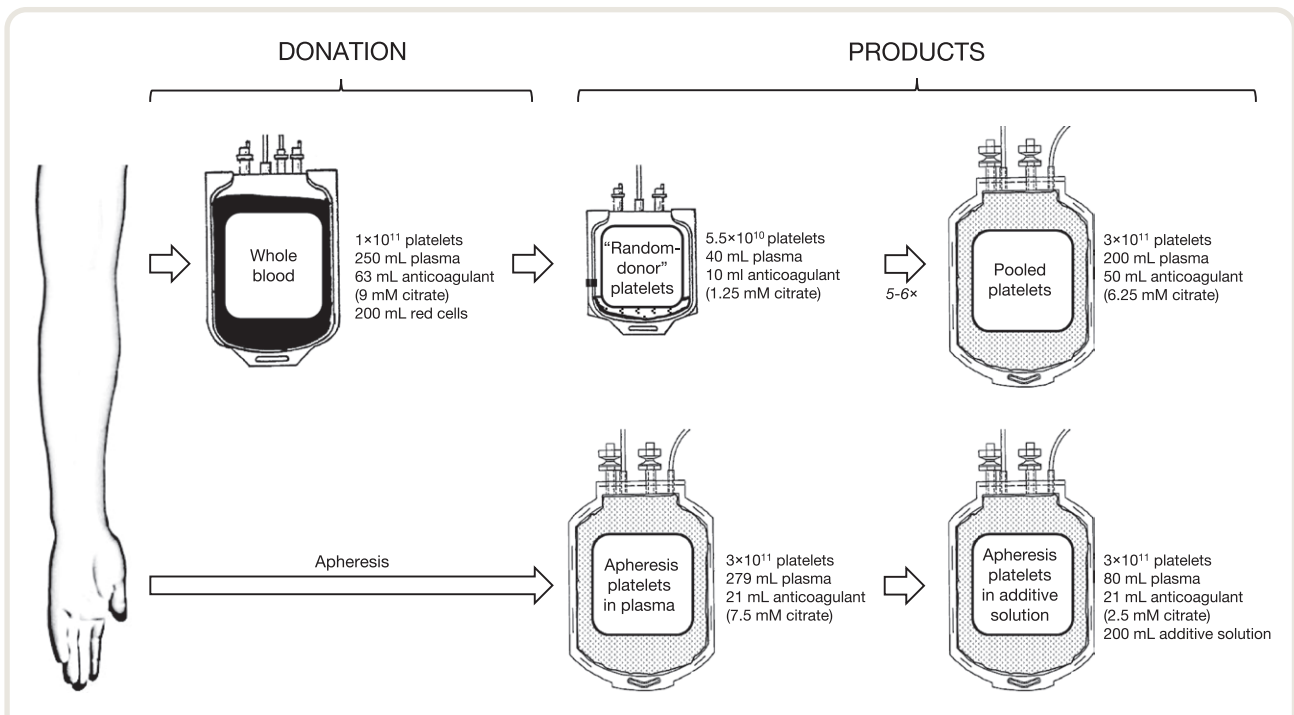

**Fig. 1.** An illustration of some of the varieties of platelet products available in the United States, how they are collected, and possible modifications to these products. Anticoagulant solutions are typically buffered salt solutions containing citrate and dextrose. Apheresis platelets in platelet additive solution are commonly referred to as “PAS platelets.”

Perinatology (Lexington, Kentucky) do not suggest a platelet count above which it is safe to perform neuraxial anesthesia, although they acknowledge that most providers consider the threshold to be between 75 and  $100 \times 10^3$  cells/ $\mu\text{L}$ .<sup>43</sup> Small observational studies of platelet transfusion to correct thrombocytopenia before neuraxial anesthesia have not detected any benefit, and many patients did not achieve their goal platelet count after transfusion.<sup>13,39</sup> Given the very low baseline rate of severe bleeding complications, it is unlikely that there will ever be definitive trial-level evidence. As with other percutaneous procedures, the anesthesiologist must weigh scant evidence against the clinical needs of the patient.

### Thrombocytopenia and Prophylactic Platelet Transfusions before Airway Procedures

Limited data suggest that thrombocytopenia does not significantly increase the risks of airway procedures. A retrospective study of every bronchoscopy performed at two academic medical centers over a 5-yr period identified 72 patients with platelet counts less than  $50 \times 10^3$  cells/ $\mu\text{L}$  (including 35 with counts less than  $20 \times 10^3$  cells/ $\mu\text{L}$ ), and none had periprocedural bleeding by British Thoracic Society (London, United Kingdom) criteria.<sup>44</sup> In the absence of high-quality evidence, some authors and professional societies state that oropharyngeal and airway procedures such as bronchoscopy and endoscopy can be

performed at a platelet count greater than  $20 \times 10^3$  cells/ $\mu\text{L}$  without excessive risk.<sup>45</sup>

### Thrombocytopenia and Prophylactic Platelet Transfusions before Low-risk Surgery

It is traditional that major surgery can proceed at or above a platelet count of  $50 \times 10^3$  cells/ $\mu\text{L}$ .<sup>39</sup> Perioperative thrombocytopenia is associated with worse outcomes, but platelet transfusion in retrospective studies is not associated with reduced perioperative bleeding, transfusion, or mortality.<sup>29,31</sup> The American Society of Anesthesiologists states that low bleeding-risk surgeries and vaginal deliveries may be performed at a platelet count less than  $50 \times 10^3$  cells/ $\mu\text{L}$ , and that platelet therapy may be indicated for patients with platelet counts between 50 and  $100 \times 10^3$  cells/ $\mu\text{L}$ .<sup>46</sup> The American Society of Clinical Oncology recommends a slightly more relaxed threshold of 40 to  $50 \times 10^3$  cells/ $\mu\text{L}$  for all major invasive procedures.<sup>39</sup>

### Therapeutic Platelet Transfusion for Bleeding after Cardiopulmonary Bypass

Cardiopulmonary bypass causes a transient platelet dysfunction associated with the selective release of platelet alpha-granule contents, which include factor V, von Willebrand factor, and fibrinogen.<sup>1,47</sup> It was once common practice to prophylactically transfuse platelets before



separation from bypass, but many societies explicitly recommend against this practice, and suggest that platelets should not be transfused to patients with a platelet count above  $50 \times 10^3$  cells/ $\mu\text{l}$  who do not exhibit perioperative bleeding.<sup>38</sup> In those who do bleed, however, platelet transfusion seems beneficial: in a subgroup analysis of 324 patients enrolled in the Red Cell Storage Duration Study who had massive transfusion during cardiac surgery, patients given higher ratios of platelets to red cells had greater improvement in their Multiple Organ Dysfunction Score compared with patients who received lower ratios.<sup>48</sup> The Society of Cardiovascular Anesthesiologists (East Dundee, Illinois) suggests that platelets are indicated for bleeding patients with a count less than  $50 \times 10^3$  cells/ $\mu\text{l}$ , and that they may be indicated for patients with a count between 50 and  $100 \times 10^3$  cells/ $\mu\text{l}$ , but that transfusion should be guided by pre-defined, laboratory-guided algorithms.<sup>49</sup> The empiric use of 1-deamino-8-D-arginine-vasopressin to reverse cardiopulmonary bypass-associated platelet dysfunction does not significantly reduce transfusion requirements.<sup>50</sup> As noted, there is significant variability in transfusion rates among surgeons and anesthesiologists in cardiac surgery, even when controlling extensively for patient and procedural factors.<sup>15,16</sup>

### Therapeutic Platelet Transfusion for Bleeding after Traumatic Injury

Traumatic injury is associated with diffuse endothelial damage and coagulopathy, and most deaths in the first 6 h after trauma are due to bleeding.<sup>51</sup> Thrombocytopenia after trauma is strongly associated with mortality, so early and aggressive platelet transfusion has been hypothesized to be beneficial.<sup>28</sup> In the Pragmatic, Randomized Optimal Platelet and Plasma Ratios trial, severely injured patients who were predicted to need massive transfusion were randomized to receive initial resuscitation with plasma, platelets, and red blood cells in a 1:1:1 or 1:1:2 ratio.<sup>52</sup> Blood products were delivered by cooler, and only patients in the 1:1:1 arm received platelets in the first cooler. In the subgroup of patients who received only one cooler (and were effectively randomized to get either one or zero units of apheresis platelets), those who received platelets had significantly decreased 24-h and 30-day mortality, had a greater likelihood of hemostasis, and were less likely to die by exsanguination.<sup>2</sup> The American College of Surgeons (Chicago, Illinois) Trauma Quality Improvement Program now recommends transfusing red cells and platelets in a 1:1 ratio, e.g., 1 unit of apheresis platelets for every 6 units of red cells.<sup>53</sup>

### Prophylactic and Therapeutic Platelet Transfusion in the Setting of Antiplatelet Therapy

Platelet inhibitors are commonly used to prevent arterial thrombosis and coronary ischemia. Antiplatelet drugs are typically held before major surgery and resumed once the

risk of perioperative bleeding has passed, although they may be continued. Aspirin is usually continued for isolated coronary artery bypass grafting, and patients requiring urgent or emergent cardiac surgery are frequently on dual therapy with aspirin plus a P2Y<sub>12</sub> inhibitor such as clopidogrel, prasugrel, or ticagrelor at the time of presentation. These patients are challenging to manage, and residual antiplatelet effects are associated with perioperative bleeding and transfusion,<sup>54</sup> so cautious delay is recommended, along with possible platelet function testing to guide operative timing.<sup>38,55–57</sup> The role of platelet function testing in patients on antiplatelet therapy has been recently reviewed in this journal.<sup>58</sup> When surgery must proceed before the antiplatelet effect has passed, limited data suggest that platelet transfusion may help in a dose-dependent fashion. A single-center trial of platelet transfusion during emergency craniotomy for basal ganglia hemorrhage found that, among patients with an aspirin effect detectable by aggregometry, 1 to 2 units of previously frozen apheresis platelets were associated with lower postoperative hemorrhage and mortality.<sup>59</sup> For clopidogrel and prasugrel, *in vitro* and *ex vivo* experiments suggest that 2 to 10 units of apheresis platelets may be necessary to reverse the antiplatelet effect, depending on the degree of inhibition.<sup>60</sup> Ticagrelor appears to be practically irreversible within 24 h of administration—a laboratory finding supported by clinical case reports—but at 24 to 48 h after administration, adequate reversal might be achieved with at least 3 to 4 units of apheresis platelets.<sup>60</sup> In the absence of clinical data, these doses and assumptions of efficacy must be received with caution.

In certain circumstances, platelet therapy may be contraindicated: one trial of 190 patients with intracranial hemorrhage on aspirin or other antiplatelet therapy randomized to receive platelet transfusions or standard care found a significantly increased composite rate of death or functional dependence in the platelet arm.<sup>3</sup> These patients were managed without invasive interventions, and there was some baseline imbalance that may have affected the outcome, so the results should not be applied to patients undergoing open surgery.

### Perioperative Platelet Transfusion for Obstetrics, Liver Disease, and Others

There are many challenging situations in which the anesthesiologist will have to make decisions about platelet therapy with little data. These include obstetric hemorrhage, advanced liver disease, and disseminated intravascular coagulopathy. For obstetric hemorrhage, the American College of Obstetricians and Gynecologists (Washington, D.C.) advocates using 1:1:1 ratios of red cells, plasma, and platelets until resuscitation can be guided by a laboratory-driven algorithm.<sup>61</sup> In advanced liver disease, thrombocytopenia may be a misleading indicator of the patient's true bleeding tendency, and evidence from small trials suggests that transfusion algorithms incorporating viscoelastic testing

reduce blood use but not mortality.<sup>62</sup> For patients with disseminated intravascular coagulopathy who require surgery, there are no specific recommendations or guidelines; the anesthesiologist should be aware that patients may require larger-than-expected doses of platelets because of ongoing consumption.

### Conclusions

Platelet transfusion is the primary therapy for patients with thrombocytopenia or platelet dysfunction who require procedures or surgery. Specific platelet triggers and goals vary with the clinical circumstances, and there is no high-quality evidence to guide perioperative practice. Stored donor platelets as they are currently available may not be an optimal therapy, and yet there are not proven alternatives in most situations. Platelet therapy is best guided by predefined protocols incorporating laboratory testing. It is acceptable under most society guidelines for patients to undergo low-risk procedures such as central lines and airway management with platelet counts greater than or equal to  $20 \times 10^3$  cells/ $\mu\text{l}$ , high-risk percutaneous procedures and major surgery with counts greater than or equal to  $50 \times 10^3$  cells/ $\mu\text{l}$ , neuraxial anesthesia with counts greater than or equal to  $75$  to  $100 \times 10^3$  cells/ $\mu\text{l}$ , and neurologic or ophthalmological surgery with counts greater than or equal to  $100 \times 10^3$  cells/ $\mu\text{l}$ . Most patients, however, will tolerate these procedures at lower platelet counts without severe complications. High-quality clinical trials investigating platelet storage technologies, platelet function testing, perioperative transfusion strategies, and alternatives to platelets are urgently needed. The anesthesiologist must weigh limited evidence alongside patient, operator, and institutional factors as they decide when to transfuse.

### Research Support

Support was provided solely from institutional and/or departmental sources.

### Competing Interests

Dr. J. R. Hess is a shareholder in Medcura (Riverdale Park, Maryland), has received author royalties from UpToDate.com (Waltham, Maryland) for writing a chapter on “Massive Transfusion,” is a consultant for Hemerus, LLC (St. Paul, Minnesota), is the inventor of the AS-7 RBC storage solution, serves as an advisor to the licensee of the U.S. Government patents for AS-7, and receives book royalties from AABB Press (Bethesda, Maryland) for the book *Massive Transfusion*, which he coauthored. The other authors declare no competing interests.

### Correspondence

Address correspondence to Dr. A. S. Hess: University of Wisconsin Department of Anesthesiology, B6/319, 600

Highland Ave., Madison, Wisconsin 53792. Ahess5@wisc.edu. ANESTHESIOLOGY's articles are made freely accessible to all readers on [www.anesthesiology.org](http://www.anesthesiology.org), for personal use only, 6 months from the cover date of the issue.

### References

1. Furie B, Furie BC: Mechanisms of thrombus formation. *N Engl J Med* 2008; 359:938–49
2. Cardenas JC, Zhang X, Fox EE, Cotton BA, Hess JR, Schreiber MA, Wade CE, Holcomb JB; PROPPR Study Group: Platelet transfusions improve hemostasis and survival in a substudy of the prospective, randomized PROPPR trial. *Blood Adv* 2018; 2:1696–704
3. Baharoglu MI, Cordonnier C, Al-Shahi Salman R, de Gans K, Koopman MM, Brand A, Majoie CB, Beenen LF, Marquering HA, Vermeulen M, Nederkoorn PJ, de Haan RJ, Roos YB; PATCH Investigators: Platelet transfusion *versus* standard care after acute stroke due to spontaneous cerebral haemorrhage associated with antiplatelet therapy (PATCH): A randomised, open-label, phase 3 trial. *Lancet* 2016; 387:2605–13
4. Levy JH, Rossaint R, Zacharowski K, Spahn DR: What is the evidence for platelet transfusion in perioperative settings? *Vox Sang* 2017; 112:704–12
5. Bizzozero G: A new constituent part of blood and its role in thrombosis and blood coagulation [Ueber einen neuen formbestandtheil des blutes und dessen rolle bei der thrombose und der blutgerinnung]. *Virchows Arch Pathol Anat Physiol Klin Med* 1882; 90:261–332
6. Freireich EJ, Schmidt PJ, Schneiderman MA, Frei E III: A comparative study of the effect of transfusion of fresh and preserved whole blood on bleeding in patients with acute leukemia. *N Engl J Med* 1959; 260:6–11
7. Aster RH: Blood platelet kinetics and platelet transfusion. *J Clin Invest* 2013; 123:4564–5
8. Levin RH, Pert JH, Freireich EJ: Response to transfusion of platelets pooled from multiple donors and the effects of various technics of concentrating platelets. *Transfusion* 1965; 5:54–63
9. Slichter SJ, Kaufman RM, Assmann SF, McCullough J, Triulzi DJ, Strauss RG, Gernsheimer TB, Ness PM, Brecher ME, Josephson CD, Konkle BA, Woodson RD, Ortel TL, Hillyer CD, Skerrett DL, McCrae KR, Sloan SR, Uhl L, George JN, Aquino VM, Manno CS, McFarland JG, Hess JR, Leissinger C, Granger S: Dose of prophylactic platelet transfusions and prevention of hemorrhage. *N Engl J Med* 2010; 362:600–13
10. Stanworth SJ, Estcourt LJ, Powter G, Kahan BC, Dyer C, Choo L, Bakrania L, Llewelyn C, Littlewood T, Soutar R, Norfolk D, Coppstone A, Smith N, Kerr P, Jones G, Raj K, Westerman DA, Szer J, Jackson N, Bardy PG, Plews D, Lyons S, Bielby L, Wood EM, Murphy MF; TOPPS Investigators: A no-prophylaxis

- platelet-transfusion strategy for hematologic cancers. *N Engl J Med* 2013; 368:1771–80
11. Fayed NA, Abdallah AR, Khalil MK, Marwan IK: Therapeutic rather than prophylactic platelet transfusion policy for severe thrombocytopenia during liver transplantation. *Platelets* 2014; 25:576–86
  12. Estcourt LJ, Desborough M, Hopewell S, Doree C, Stanworth SJ. Comparison of different platelet transfusion thresholds prior to insertion of central lines in patients with thrombocytopenia. *Cochrane Database Syst Rev*. 2015; 12:CD011771
  13. Estcourt LJ, Malouf R, Hopewell S, Doree C, Van Veen J: Use of platelet transfusions prior to lumbar punctures or epidural anaesthesia for the prevention of complications in people with thrombocytopenia. *Cochrane Database Syst Rev* 2018; 4:CD011980
  14. Avidan MS, Alcock EL, Da Fonseca J, Ponte J, Desai JB, Despotis GJ, Hunt BJ: Comparison of structured use of routine laboratory tests or near-patient assessment with clinical judgement in the management of bleeding after cardiac surgery. *Br J Anaesth* 2004; 92:178–86
  15. Cote C, MacLeod JB, Yip AM, Ouzounian M, Brown CD, Forgie R, Pelletier MP, Hassan A: Variation in transfusion rates within a single institution: Exploring the effect of differing practice patterns on the likelihood of blood product transfusion in patients undergoing cardiac surgery. *J Thorac Cardiovasc Surg* 2015; 149:297–302
  16. Snyder-Ramos SA, Möhnlé P, Weng YS, Böttiger BW, Kulier A, Levin J, Mangano DT; Investigators of the Multicenter Study of Perioperative Ischemia; MCSPI Research Group: The ongoing variability in blood transfusion practices in cardiac surgery. *Transfusion* 2008; 48:1284–99
  17. AABB: Circular of information for the use of human blood and blood components. October 2017. Available at: <https://www.aabb.org/tm/coi/Documents/coi1017.pdf>. Accessed July 24, 2020.
  18. Dunbar NM, Yazer MH: Confusion surrounding trauma resuscitation and opportunities for clarification. *Transfusion* 2020; 60(suppl 3):142–9
  19. Davis KB, Slichter SJ, Corash L: Corrected count increment and percent platelet recovery as measures of posttransfusion platelet response: Problems and a solution. *Transfusion* 1999; 39:586–92
  20. Pagano MB, Katchatag BL, Khoobyari S, Van Gerwen M, Sen N, Rebecca Haley N, Gernsheimer TB, Hess JR, Metcalf RA: Evaluating safety and cost-effectiveness of platelets stored in additive solution (PAS-F) as a hemolysis risk mitigation strategy. *Transfusion* 2019; 59:1246–51
  21. van der Meer PF, de Korte D: Platelet additive solutions: A review of the latest developments and their clinical implications. *Transfus Med Hemother* 2018; 45:98–102
  22. Vostal JG, Gelderman MP, Skripchenko A, Xu F, Li Y, Ryan J, Cheng C, Whitley P, Wellington M, Sawyer S, Hanley S, Wagner SJ: Temperature cycling during platelet cold storage improves *in vivo* recovery and survival in healthy volunteers. *Transfusion* 2018; 58:25–33
  23. Becker GA, Tuccelli M, Kunicki T, Chalos MK, Aster RH: Studies of platelet concentrates stored at 22 C nad 4 C. *Transfusion* 1973; 13:61–8
  24. Filip DJ, Aster RH: Relative hemostatic effectiveness of human platelets stored at 4 degrees and 22 degrees C. *J Lab Clin Med* 1978; 91:618–24
  25. Reddoch KM, Pidcoke HF, Montgomery RK, Fedyk CG, Aden JK, Ramasubramanian AK, Cap AP: Hemostatic function of apheresis platelets stored at 4°C and 22°C. *Shock* 2014; 41(suppl 1):54–61
  26. Jackson B, Murphy C, Fontaine MJ: Current state of whole blood transfusion for civilian trauma resuscitation. *Transfusion* 2020; 60(suppl 3):45–52
  27. Gallaher JR, Dixon A, Cockcroft A, Grey M, Dewey E, Goodman A, Schreiber M: Large volume transfusion with whole blood is safe compared with component therapy. *J Trauma Acute Care Surg* 2020; 89:238–45
  28. Holcomb JB, del Junco DJ, Fox EE, Wade CE, Cohen MJ, Schreiber MA, Alarcon LH, Bai Y, Brasel KJ, Bulger EM, Cotton BA, Matijevic N, Muskat P, Myers JG, Phelan HA, White CE, Zhang J, Rahbar MH; PROMMTT Study Group: The prospective, observational, multicenter, major trauma transfusion (PROMMTT) study: Comparative effectiveness of a time-varying treatment with competing risks. *JAMA Surg* 2013; 148:127–36
  29. Warner MA, Jia Q, Clifford L, Wilson G, Brown MJ, Hanson AC, Schroeder DR, Kor DJ: Preoperative platelet transfusions and perioperative red blood cell requirements in patients with thrombocytopenia undergoing noncardiac surgery. *Transfusion* 2016; 56:682–90
  30. Aster RH, Curtis BR, McFarland JG, Bougie DW: Drug-induced immune thrombocytopenia: Pathogenesis, diagnosis, and management. *J Thromb Haemost* 2009; 7:911–8
  31. Weil IA, Kumar P, Seicean S, Neuhauser D, Seicean A: Platelet count abnormalities and peri-operative outcomes in adults undergoing elective, non-cardiac surgery. *PLoS One* 2019; 14:e0212191
  32. Slichter SJ, Davis K, Enright H, Braine H, Gernsheimer T, Kao KJ, Kickler T, Lee E, McFarland J, McCullough J, Rodey G, Schiffer CA, Woodson R: Factors affecting posttransfusion platelet increments, platelet refractoriness, and platelet transfusion intervals in thrombocytopenic patients. *Blood* 2005; 105:4106–14
  33. Stanworth SJ, Navarrete C, Estcourt L, Marsh J: Platelet refractoriness—practical approaches and ongoing dilemmas in patient management. *Br J Haematol* 2015; 171:297–305

34. Hanson SR, Slichter SJ: Platelet kinetics in patients with bone marrow hypoplasia: evidence for a fixed platelet requirement. *Blood* 1985; 66:1105–9
35. Rebullà P, Finazzi G, Marangoni F, Avvisati G, Gugliotta L, Tognoni G, Barbui T, Mandelli F, Sirchia G: The threshold for prophylactic platelet transfusions in adults with acute myeloid leukemia. Gruppo Italiano Malattie Ematologiche Maligne dell'Adulto. *N Engl J Med* 1997; 337:1870–5
36. Rocha LL, Neto AS, Pessoa CMS, Almeida MD, Juffermans NP, Crochemore T, Rodrigues RR, Filho RR, de Freitas Chaves RC, Cavalheiro AM, Prado RR, Assunção MSC, Guardia BD, Silva E, Corrêa TD: Comparison of three transfusion protocols prior to central venous catheterization in patients with cirrhosis: A randomized controlled trial. *J Thromb Haemost* 2020; 18:560–70
37. Patel IJ, Rahim S, Davidson JC, Hanks SE, Tam AL, Walker TG, Wilkins LR, Sarode R, Weinberg I: Society of Interventional Radiology consensus guidelines for the periprocedural management of thrombotic and bleeding risk in patients undergoing percutaneous image-guided interventions-Part II: Recommendations: Endorsed by the Canadian Association for Interventional Radiology and the Cardiovascular and Interventional Radiological Society of Europe. *J Vasc Interv Radiol* 2019; 30:1168–1184.e1
38. Kaufman RM, Djulbegovic B, Gernsheimer T, Kleinman S, Timmouth AT, Capocelli KE, Cipolle MD, Cohn CS, Fung MK, Grossman BJ, Mintz PD, O'Malley BA, Sesok-Pizzini DA, Shander A, Stack GE, Webert KE, Weinstein R, Welch BG, Whitman GJ, Wong EC, Tobian AA; AABB: Platelet transfusion: A clinical practice guideline from the AABB. *Ann Intern Med* 2015; 162:205–13
39. Schiffer CA, Bohlke K, Delaney M, Hume H, Magdalinski AJ, McCullough JJ, Omel JL, Rainey JM, Rebullà P, Rowley SD, Troner MB, Anderson KC: Platelet transfusion for patients with cancer: American Society of Clinical Oncology Clinical Practice Guideline Update. *J Clin Oncol* 2018; 36:283–99
40. Howard SC, Gajjar A, Ribeiro RC, Rivera GK, Rubnitz JE, Sandlund JT, Harrison PL, de Armendi A, Dahl GV, Pui CH: Safety of lumbar puncture for children with acute lymphoblastic leukemia and thrombocytopenia. *JAMA* 2000; 284:2222–4
41. Bodilsen J, Mariager T, Vestergaard HH, Christiansen MH, Kunwald M, Lüttichau HR, Kristensen BT, Bjarkam CR, Nielsen H: Association of lumbar puncture with spinal hematoma in patients with and without coagulopathy. *JAMA* 2020; 324:1419–28
42. Ning S, Kerbel B, Callum J, Lin Y: Safety of lumbar punctures in patients with thrombocytopenia. *Vox Sang* 2016; 110:393–400
43. Practice guidelines for obstetric anesthesia: An updated report by the American Society of Anesthesiologists Task Force on Obstetric Anesthesia and the Society for Obstetric Anesthesia and Perinatology. *ANESTHESIOLOGY* 2016; 124:270–300
44. Nandagopal L, Veeraputhiran M, Jain T, Soubani AO, Schiffer CA: Bronchoscopy can be done safely in patients with thrombocytopenia. *Transfusion* 2016; 56:344–8
45. Greinacher A, Selleng K: Thrombocytopenia in the intensive care unit patient. *Hematology Am Soc Hematol Educ Program* 2010; 2010:135–43
46. American Society of Anesthesiologists Task Force on Perioperative Blood Transfusion and Adjuvant Therapies: Practice guidelines for perioperative blood transfusion and adjuvant therapies: An updated report by the American Society of Anesthesiologists Task Force on Perioperative Blood Transfusion and Adjuvant Therapies. *ANESTHESIOLOGY* 2006; 105:198–208
47. Harker LA, Malpass TW, Branson HE, Hessel EA II, Slichter SJ: Mechanism of abnormal bleeding in patients undergoing cardiopulmonary bypass: Acquired transient platelet dysfunction associated with selective alpha-granule release. *Blood* 1980; 56:824–34
48. Delaney M, Stark PC, Suh M, Triulzi DJ, Hess JR, Steiner ME, Stowell CP, Sloan SR: Massive transfusion in cardiac surgery: The impact of blood component ratios on clinical outcomes and survival. *Anesth Analg* 2017; 124:1777–82
49. Raphael J, Mazer CD, Subramani S, Schroeder A, Abdalla M, Ferreira R, Roman PE, Patel N, Welsby I, Greilich PE, Harvey R, Ranucci M, Heller LB, Boer C, Wilkey A, Hill SE, Nuttall GA, Palvadi RR, Patel PA, Wilkey B, Gaitan B, Hill SS, Kwak J, Klick J, Bollen BA, Shore-Lesserson L, Abernathy J, Schwann N, Lau WT: Society of Cardiovascular Anesthesiologists clinical practice improvement advisory for management of perioperative bleeding and hemostasis in cardiac surgery patients. *Anesth Analg* 2019; 129:1209–21
50. Desborough MJ, Oakland K, Brierley C, Bennett S, Doree C, Trivella M, Hopewell S, Stanworth SJ, Estcourt LJ: Desmopressin use for minimising perioperative blood transfusion. *Cochrane Database Syst Rev* 2017; 7:CD001884
51. Dutton RP, Stansbury LG, Leone S, Kramer E, Hess JR, Scalea TM: Trauma mortality in mature trauma systems: Are we doing better? An analysis of trauma mortality patterns, 1997–2008. *J Trauma* 2010; 69:620–6
52. Holcomb JB, Tilley BC, Baraniuk S, Fox EE, Wade CE, Podbielski JM, del Junco DJ, Brasel KJ, Bulger EM, Callcut RA, Cohen MJ, Cotton BA, Fabian TC, Inaba K, Kerby JD, Muskat P, O'Keefe T, Rizoli S, Robinson BR, Scalea TM, Schreiber MA, Stein DM, Weinberg JA, Callum JL, Hess JR, Matijevic N, Miller CN, Pittet JF, Hoyt DB, Pearson GD, Leroux B, van Belle G; PROPPR Study Group: Transfusion of plasma, platelets, and red blood cells in a 1:1:1 vs a 1:1:2 ratio and mortality in patients with severe trauma:



- The PROPPR randomized clinical trial. *JAMA* 2015; 313:471–82
53. Committee on Trauma of the American College of Surgeons: ACS TQIP massive transfusion in trauma guidelines. 2015. Available at: [https://www.facs.org/-/media/files/quality-programs/trauma/tqip/transfusion\\_guidelines.ashx](https://www.facs.org/-/media/files/quality-programs/trauma/tqip/transfusion_guidelines.ashx). Accessed August 3, 2020.
  54. Siller-Matula JM, Petre A, Delle-Karth G, Huber K, Ay C, Lordkipanidzé M, De Caterina R, Kolh P, Mahla E, Gersh BJ: Impact of preoperative use of P2Y<sub>12</sub> receptor inhibitors on clinical outcomes in cardiac and non-cardiac surgery: A systematic review and meta-analysis. *Eur Heart J Acute Cardiovasc Care* 2017; 6:753–70
  55. Pagano D, Milojevic M, Meesters MI, Benedetto U, Bolliger D, von Heymann C, Jeppsson A, Koster A, Osnabrugge RL, Ranucci M, Ravn HB, Vonk ABA, Wahba A, Boer C: 2017 EACTS/EACTA Guidelines on patient blood management for adult cardiac surgery. *Eur J Cardiothorac Surg* 2018; 53:79–111
  56. Ferraris VA, Saha SP, Oestreich JH, Song HK, Rosengart T, Reece TB, Mazer CD, Bridges CR, Despotis GJ, Jointer K, Clough ER; Society of Thoracic Surgeons: 2012 update to the Society of Thoracic Surgeons guideline on use of antiplatelet drugs in patients having cardiac and noncardiac operations. *Ann Thorac Surg* 2012; 94:1761–81
  57. Kwak YL, Kim JC, Choi YS, Yoo KJ, Song Y, Shim JK: Clopidogrel responsiveness regardless of the discontinuation date predicts increased blood loss and transfusion requirement after off-pump coronary artery bypass graft surgery. *J Am Coll Cardiol* 2010; 56:1994–2002
  58. Mahla E, Tantry US, Schoerghuber M, Gurbel PA: Platelet function testing in patients on antiplatelet therapy before cardiac surgery. *ANESTHESIOLOGY* 2020; 133:1263–76
  59. Li X, Sun Z, Zhao W, Zhang J, Chen J, Li Y, Ye Y, Zhao J, Yang X, Xiang Y, Li G, Mao J, Zhang W, Zhang M, Zhang W: Effect of acetylsalicylic acid usage and platelet transfusion on postoperative hemorrhage and activities of daily living in patients with acute intracerebral hemorrhage. *J Neurosurg* 2013; 118:94–103
  60. Nagalla S, Sarode R: Role of platelet transfusion in the reversal of anti-platelet therapy. *Transfus Med Rev* 2019; 33:92–7
  61. Committee on Practice Bulletins-Obstetrics. Practice bulletin No. 183: Postpartum hemorrhage. *Obstet Gynecol* 2017; 130:e168–86
  62. De Pietri L, Bianchini M, Montalti R, De Maria N, Di Maira T, Begliomini B, Gerunda GE, di Benedetto F, Garcia-Tsao G, Villa E: Thrombelastography-guided blood product use before invasive procedures in cirrhosis with severe coagulopathy: A randomized, controlled trial. *Hepatology* 2016; 63:566–73
  63. Estcourt LJ, Birchall J, Allard S, Bassey SJ, Hersey P, Kerr JP, Mumford AD, Stanworth SJ, Tinigate H; British Committee for Standards in Haematology: Guidelines for the use of platelet transfusions. *Br J Haematol* 2017; 176:365–94
  64. ASGE Standards of Practice Committee, Ben-Menachem T, Decker GA, Early DS, Evans J, Fanelli RD, Fisher DA, Fisher L, Fukami N, Hwang JH, Ikenberry SO, Jain R, Jue TL, Khan KM, Krinsky ML, Malpas PM, Maple JT, Sharaf RN, Dominitz JA, Cash BD: Adverse events of upper GI endoscopy. *Gastrointest Endosc* 2012; 76:707–18
  65. Du Rand IA, Blaikley J, Booton R, Chaudhuri N, Gupta V, Khalid S, Mandal S, Martin J, Mills J, Navani N, Rahman NM, Wrightson JM, Munavvar M; British Thoracic Society Bronchoscopy Guideline Group: British Thoracic Society guideline for diagnostic flexible bronchoscopy in adults: Accredited by NICE. *Thorax* 2013; 68(suppl 1):i1–i44
